# Supplementary material
Source: PubMed Central journal article supplement (PMC4963495)
Supplement: JCM.00711-16_zjm999095095so2.pdf [file JCM.00711-16_zjm999095095so2.pdf]

**Supplemental Figure S1. Phylogenetic tree (UPGMA) of EAEC strain *aggR* genes isolated in Kagoshima**

The *aggR*-PCR amplicons of all EAEC strains isolated in Kagoshima were sequenced.

Representative strains are shown. The EAEC 042 strain was included in a phylogenetic representation. One SNP with a non-synonymous substitution was observed between a and b.
