# Supplementary material
Source: PubMed Central journal article supplement (PMC4963495)
Supplement: JCM.00711-16_zjm999095095so4.pdf [file JCM.00711-16_zjm999095095so4.pdf]

Supplemental Table S2. PCR primers for detection and sequencing and PCR conditions.

| target gene                | primer name | sequence (5'-3')                           | PCR conditions (30 cycles)              | Size of amplicon (bp) | References                                       |
|----------------------------|-------------|--------------------------------------------|-----------------------------------------|-----------------------|--------------------------------------------------|
| <b>EAEc</b>                |             |                                            |                                         |                       |                                                  |
| <i>aggR</i>                | aggR-F      | CAGAATACATCAGTACACTG                       | 94 °C, 30 s / 55 °C, 30 s / 72 °C, 30 s | 433                   | Tsukamoto T. <i>et al.</i> , 1996 <sup>a</sup>   |
|                            | aggR-R      | GAAGCTTACAGCCGATATAT                       |                                         |                       |                                                  |
| <i>aap</i>                 | aap-F       | TGAAAAAATAAGTTTGTATC                       | 94 °C, 30 s / 55 °C, 40 s / 72 °C, 60 s | 344                   | Sarantuya J. <i>et al.</i> , 2004 <sup>b</sup>   |
|                            | aap-R       | AACCCATTCCGTTAGAGC                         |                                         |                       |                                                  |
| <i>aatA</i>                | aatA-F      | ATGTTACCAGATATAAATATAG                     | 94 °C, 30 s / 55 °C, 40 s / 72 °C, 60 s | 1065                  | Nishi J. <i>et al.</i> , 2003 <sup>c</sup>       |
|                            | aatA-R      | CATTTCCCCTGTATTGGAAATG                     |                                         |                       |                                                  |
| <i>aggA</i>                | aggA-1      | TTAGTCTTCTATCTAGGG                         | 94 °C, 30 s / 55 °C, 30 s / 72 °C, 30 s | 457                   | Vila J., <i>et al.</i> , 2000 <sup>d</sup>       |
|                            | aggA-2      | AAATTAATCCGGCATGG                          |                                         |                       |                                                  |
| <i>aafA</i>                | aafA-1      | TGCGATTGCTACTTTATTAT                       | 94 °C, 30 s / 55 °C, 30 s / 72 °C, 30 s | 242                   | Vila J., <i>et al.</i> , 2000 <sup>d</sup>       |
|                            | aafA-2      | ATTGACCGTGATTGGCTTCC                       |                                         |                       |                                                  |
| <i>agg3A</i>               | agg3A-F     | GTATCATTGCGAGTCTGGTATTCAG                  | 94 °C, 60 s / 55 °C, 60 s / 72 °C, 60 s | 462                   | Bernier C, <i>et al.</i> , 2002 <sup>e</sup>     |
|                            | agg3A-R     | GGGCTGTATAGAGTAACCTCCAG                    |                                         |                       |                                                  |
| <i>hdaA/agg4A</i>          | hdaA-F      | TCCATTATGTCAGGCTGCAA                       | 94 °C, 30 s / 55 °C, 30 s / 72 °C, 40 s | 411                   | Boisen N., <i>et al.</i> , 2008 <sup>f</sup>     |
|                            | hdaA-R      | GGCGTTAACGTCTGATTTCC                       |                                         |                       |                                                  |
| <i>agg5A</i>               | aaf5-F      | TATCATTGCGAGTCTGGTATTCA                    | 94 °C, 30 s / 55 °C, 60 s / 72 °C, 60 s | 501                   | Prager R, <i>et al.</i> , 2014 <sup>g</sup>      |
|                            | aaf5-R      | TAATTTAAGCTGAAGAATCCAGTCAA                 |                                         |                       |                                                  |
| <i>pet</i>                 | pet-1       | ACTGGGGGACTCATTGCTGT                       | 94 °C, 30 s / 55 °C, 30 s / 72 °C, 30 s | 832                   | Vila J., <i>et al.</i> , 2000 <sup>d</sup>       |
|                            | pet-2       | GCGTTTTTCCGTTCCCTATT                       |                                         |                       |                                                  |
| <i>astA</i>                | EAST1-F     | GCCATCAACACAGTATATCC                       | 94 °C, 30 s / 55 °C, 30 s / 72 °C, 30 s | 106                   | Yatsuyanagi J, <i>et al.</i> , 1996 <sup>h</sup> |
|                            | EAST1-R     | GAGTGACGGCTTTGTAGTCC                       |                                         |                       |                                                  |
| <i>sepA</i>                | sepA-F      | GCAGTGGAATATGATGCGGC                       | 94 °C, 30 s / 59 °C, 90 s / 72 °C, 90 s | 794                   | Boisen N, <i>et al.</i> , 2012 <sup>i</sup>      |
|                            | sepA-R      | TTGTTCCAGATCGGAGAAGAACG                    |                                         |                       |                                                  |
| <i>sat</i>                 | sat-F       | TCAGAAGCTCAGCGAATCATTG                     | 94 °C, 30 s / 59 °C, 90 s / 72 °C, 90 s | 932                   | Boisen N, <i>et al.</i> , 2012 <sup>i</sup>      |
|                            | sat-R       | CCATTATCACCAGTAAAACGCCACC                  |                                         |                       |                                                  |
| <i>pic</i>                 | pic-F       | ACTGGATCTTAAGGCTCAGGAT                     | 94 °C, 30 s / 59 °C, 90 s / 72 °C, 90 s | 572                   | Boisen N, <i>et al.</i> , 2012 <sup>i</sup>      |
|                            | pic-R       | GACTTAATGTCAGTTCAGCG                       |                                         |                       |                                                  |
| <i>aaiC</i>                | aaiC-F      | TGGTGACTACTTTGATGGACATTGT                  | 94 °C, 50 s / 57 °C, 90 s / 72 °C, 90 s | 313                   | Boisen N, <i>et al.</i> , 2012 <sup>i</sup>      |
|                            | aaiC-R      | GACACTCTCTTGGGGTAACGA                      |                                         |                       |                                                  |
| <b>UPEC</b>                |             |                                            |                                         |                       |                                                  |
| <i>sfa*</i>                | sfa1        | CTCCGGAGAAGTGGGTGCATCTTAC                  | 94 °C, 60 s / 63 °C, 60 s / 72 °C, 80 s | 410                   | Yamamoto S, <i>et al.</i> , 1995 <sup>j</sup>    |
|                            | sfa2        | CGGAGGAGTAATTACAACTGGCA                    |                                         |                       |                                                  |
| <i>pap*</i>                | pap1        | GACGGCTGTACTGCAGGTTGTGGCG                  | 94 °C, 60 s / 63 °C, 60 s / 72 °C, 80 s | 328                   | Yamamoto S, <i>et al.</i> , 1995 <sup>j</sup>    |
|                            | pap2        | ATATCCTTTCTGCAGGGATGCAATA                  |                                         |                       |                                                  |
|                            | pap3        | GCAACAGCAACGCTGGTTGCATCAT                  |                                         |                       |                                                  |
|                            | pap4        | AGAGAGGCCACTCTTATACGGACA                   |                                         |                       |                                                  |
| <i>afa*</i>                | afa1        | CTGGGCGACAAACTGATAACTCTC                   | 94 °C, 60 s / 63 °C, 60 s / 72 °C, 80 s | 750                   | Yamamoto S, <i>et al.</i> , 1995 <sup>j</sup>    |
|                            | afa2        | CATCAAGCTGTTTGTTCGTCGCGCG                  |                                         |                       |                                                  |
| <i>aer*</i>                | aer1        | TACGGATTGTCATATGCAGACCGT                   | 94 °C, 60 s / 63 °C, 60 s / 72 °C, 80 s | 602                   | Yamamoto S, <i>et al.</i> , 1995 <sup>j</sup>    |
|                            | aer2        | AATATCTTCTCCAGTCCGGAGAAG                   |                                         |                       |                                                  |
| <i>cnf1</i>                | cnf1        | GGGGGAAGTACAGAAGAATTA                      | 94 °C, 60 s / 55 °C, 60 s / 72 °C, 60 s | 1126                  | Hinenoya A., <i>et al.</i> , 2009 <sup>k</sup>   |
|                            | cnf2        | TTGCCGTCCACTCTCACCAGT                      |                                         |                       |                                                  |
| <b>ESBL</b>                |             |                                            |                                         |                       |                                                  |
| <i>bla<sub>CTX-M</sub></i> | CTX-M-U1    | ATGTGCAGYACCAGTAARGTKATGGC <sup>§</sup>    | 94 °C, 30 s / 60 °C, 30 s / 72 °C, 40 s | 593                   | Boyd DA, <i>et al.</i> , 2004 <sup>l</sup>       |
|                            | CTX-M-U2    | TGGGTRAARTARGTSACCAGAAYCAGCGG <sup>§</sup> |                                         |                       |                                                  |
| <b>H antigen</b>           |             |                                            |                                         |                       |                                                  |
| <i>fliC</i>                | F-FLIC1     | ATGGCACAAGTCATTAATACCCAAC                  | 95 °C, 30 s / 60 °C, 60 s / 72 °C, 120s | ca. 1.3–2.6 kb        | Fields PI, <i>et al.</i> , 1997 <sup>m</sup>     |
|                            | R-FLIC2     | CTAACCTGCGCAGAGACA                         |                                         |                       |                                                  |

\*amplified by multiplex PCR, <sup>S</sup>Y stands for pyrimidine, R stands for purine, K stands for G or T, and S stands for G or C

<sup>a</sup>Tsukamoto T. PCR methods for detection of enteropathogenic *Escherichia coli* (localized adherence) and enteroaggregative *Escherichia coli*. Kansenshogaku Zasshi 70(6):569-573, 1996 (jpn)

<sup>b</sup>Sarantuya J, *et al.* 2004. Typical enteroaggregative *Escherichia coli* is the most prevalent pathotype among *E. coli* strains causing diarrhea in Mongolian children. J Clin Microbiol 42:133-139.

<sup>c</sup>Nishi J, *et al.* 2003. The export of coat protein from enteroaggregative *Escherichia coli* by a specific ATP-binding cassette transporter system. J Biol Chem 278:45680-45689.

<sup>d</sup>Vila J, *et al.* Enteroaggregative *Escherichia coli* virulence factors in traveler's diarrhea strains. J Infect Dis 182(6):1780-1783, 2000

<sup>e</sup>Bernier C, *et al.* Identification of an aggregative adhesion fimbria (AAF) type III-encoding operon in enteroaggregative *Escherichia coli* as a sensitive probe for detecting the AAF-encoding operon family. Infect Immun 70(8):4302-4311, 2002

<sup>f</sup>Boisen N, *et al.* New adhesin of enteroaggregative *Escherichia coli* related to the Afa/Dr/AAF family. Infect Immun 76(7):3281-3292, 2008

<sup>g</sup>Prager R, *et al.* Two Novel EHEC/EAEc Hybrid Strains Isolated from Human Infections. PLoS One 9:e95379.

<sup>h</sup>Yatsuyanagi J, *et al.* Enteropathogenic *Escherichia coli* strains harboring enteroaggregative *Escherichia coli* (EAaggEC) heat-stable enterotoxin-1 gene isolated from a food-borne like outbreak. Kansenshogaku Zasshi 70(1):73-79, 1996 (jpn)

<sup>i</sup>Boisen N, *et al.* 2012. Genomic characterization of enteroaggregative *Escherichia coli* from children in Mali. J Infect Dis 205:431-444.

<sup>j</sup>Yamamoto S, *et al.* 1995. Detection of urovirulence factors in *Escherichia coli* by multiplex polymerase chain reaction. FEMS Immunol Med Microbiol 12:85-90.

<sup>k</sup>Hinenoya A, *et al.* Prevalence and characteristics of cytolethal distending toxin-producing *Escherichia coli* from children with diarrhea in Japan. Microbiol Immunol 53(4):206-215, 2009

<sup>l</sup>Boyd DA, *et al.* 2004. Complete nucleotide sequence of a 92-kilobase plasmid harboring the CTX-M-15 extended-spectrum  $\beta$ -lactamase involved in an outbreak in long-term-care facilities in Toronto, Canada. Antimicrob Agents Chemother 48:3758-3764.

<sup>m</sup>Fields PI, *et al.* 1997. Molecular characterization of the gene encoding H antigen in *Escherichia coli* and development of a PCR-restriction fragment length polymorphism test for identification of *E. coli* O157:H7 and O157:NM. J Clin Microbiol 35:1066-1070.
