# Supplementary material
Source: PubMed Central journal article supplement (PMC4963495)
Supplement: JCM.00711-16_zjm999095095so5.pdf [file JCM.00711-16_zjm999095095so5.pdf]

Supplemental Table S3. Characteristics of *aggR*-positive EAEC strains/clusters and the number of strains possessing the virulence genes and the *bla*<sub>CTX-M</sub> gene.

| cluster/strain                                         | ST or CG      | No. of strains |    |    | EAEC virulence |             |            |      |      |      |      |      |            |             |             |            |            | UPEC virulence |            |            |            |             | ESBL CTX-M (subtype) | serotype (% No./Total) | biofilm index                                |             |
|--------------------------------------------------------|---------------|----------------|----|----|----------------|-------------|------------|------|------|------|------|------|------------|-------------|-------------|------------|------------|----------------|------------|------------|------------|-------------|----------------------|------------------------|----------------------------------------------|-------------|
|                                                        |               |                |    |    | plasmid        |             |            |      |      |      |      |      |            |             | chromosome  |            |            | <i>sfa</i>     | <i>pap</i> | <i>afa</i> | <i>aer</i> | <i>cnf1</i> |                      |                        |                                              |             |
|                                                        |               |                |    |    | <i>aggR</i>    | <i>aatA</i> | <i>aap</i> | AAF1 | AAF2 | AAF3 | AAF4 | AAF5 | <i>pet</i> | <i>astA</i> | <i>sepA</i> | <i>sat</i> | <i>pic</i> |                |            |            |            |             |                      |                        |                                              | <i>aaiC</i> |
| <b>C1</b><br>K7484<br>K7668<br>K7701<br>K7164<br>K7225 | <b>CG200</b>  | 2              | 2  |    | 2              | 2           | 2          | 0    | 2    | 0    | 0    | 0    | 2          | 2           | 0           | 0          | 2          | 2              | 0          | 0          | 0          | 0           | 0                    | 0                      | O126:H27 (45%,13/29)<br>O126:HND (24%, 7/29) | 0.89 ± 0.80 |
| C2                                                     |               | 2              | 2  |    | 2              | 2           | 2          | 0    | 2    | 0    | 0    | 0    | 2          | 0           | 0           | 0          | 2          | 2              | 0          | 0          | 0          | 0           | 0                    | 0                      |                                              |             |
| C3                                                     |               | 19             | 18 | 1  | 19             | 14          | 16         | 0    | 17   | 0    | 0    | 0    | 14         | 18          | 0           | 0          | 16         | 18             | 0          | 0          | 1          | 0           | 0                    | 0                      |                                              |             |
| K2626                                                  |               | 1              | 1  |    | 1              | 1           | 1          | 0    | 1    | 0    | 0    | 0    | 1          | 1           | 0           | 0          | 0          | 1              | 0          | 0          | 0          | 0           | 0                    | 0                      |                                              |             |
| C4                                                     |               | 3              | 3  |    | 3              | 3           | 3          | 0    | 0    | 0    | 0    | 2    | 0          | 1           | 1           | 1          | 2          | 3              | 0          | 0          | 0          | 0           | 0                    | 0                      |                                              |             |
| C5                                                     |               | 41             | 29 | 12 | 41             | 41          | 39         | 0    | 0    | 0    | 0    | 39   | 3          | 15          | 18          | 28         | 33         | 40             | 0          | 0          | 0          | 18          | 0                    | 0                      |                                              |             |
| K761                                                   | 1             | 1              |    | 1  | 1              | 1           | 0          | 0    | 0    | 0    | 1    | 0    | 1          | 1           | 0           | 1          | 1          | 0              | 0          | 0          | 1          | 0           | 0                    |                        |                                              |             |
| K3536                                                  | 1             | 1              |    | 1  | 1              | 1           | 0          | 0    | 0    | 0    | 1    | 0    | 0          | 1           | 0           | 1          | 1          | 0              | 0          | 0          | 0          | 0           | 0                    |                        |                                              |             |
| K3538                                                  | 1             | 1              |    | 1  | 1              | 1           | 0          | 0    | 0    | 0    | 1    | 0    | 0          | 0           | 1           | 1          | 1          | 0              | 0          | 0          | 0          | 0           | 0                    |                        |                                              |             |
| K8028                                                  | 1             | 1              |    | 1  | 1              | 1           | 0          | 0    | 1    | 0    | 0    | 0    | 1          | 0           | 0           | 0          | 1          | 0              | 0          | 0          | 0          | 0           | 0                    |                        |                                              |             |
| K665                                                   | 1             | 1              |    | 1  | 1              | 1           | 0          | 0    | 0    | 0    | 1    | 0    | 1          | 1           | 0           | 1          | 1          | 0              | 0          | 0          | 0          | 0           | 0                    |                        |                                              |             |
| K692                                                   | 1             | 1              |    | 1  | 1              | 1           | 0          | 0    | 0    | 0    | 1    | 0    | 1          | 0           | 1           | 1          | 1          | 0              | 0          | 0          | 0          | 0           | 0                    |                        |                                              |             |
| K2518                                                  | <b>CG295</b>  | 1              | 1  |    | 1              | 0           | 1          | 0    | 0    | 0    | 1    | 0    | 0          | 1           | 1           | 0          | 1          | 1              | 0          | 0          | 0          | 0           | 0                    | 0                      | O126:HND                                     | 0.55 ± 0.13 |
| C6                                                     |               | 2              |    | 2  | 2              | 2           | 2          | 0    | 0    | 0    | 1    | 1    | 0          | 0           | 1           | 2          | 2          | 2              | 0          | 0          | 0          | 1           | 0                    | 0                      | O126:H12                                     |             |
| K4586                                                  | <b>CG3570</b> | 1              | 1  |    | 1              | 0           | 1          | 0    | 0    | 0    | 1    | 0    | 0          | 0           | 1           | 0          | 0          | 1              | 0          | 0          | 0          | 1           | 0                    | 0                      | O86a:H27 (61%, 11/18)                        | 0.57 ± 0.25 |
| C7                                                     |               | 16             | 8  | 8  | 16             | 14          | 15         | 0    | 0    | 0    | 14   | 1    | 0          | 3           | 16          | 10         | 16         | 16             | 1          | 0          | 0          | 13          | 0                    | 0                      | O86a:HND (22%, 4/18)                         |             |
| K9517                                                  |               | 1              | 1  |    | 1              | 1           | 1          | 0    | 0    | 0    | 1    | 0    | 0          | 0           | 1           | 1          | 1          | 1              | 0          | 0          | 0          | 1           | 0                    | 0                      |                                              |             |
| K4513                                                  | ST162 clx*    | 1              | 1  |    | 1              | 0           | 1          | 0    | 0    | 0    | 0    | 1    | 0          | 1           | 0           | 0          | 0          | 0              | 1          | 1          | 0          | 0           | 0                    | 0                      | OUT:H19                                      | 0           |
| K8077                                                  | ST3750 clx    | 1              | 1  |    | 1              | 1           | 1          | 1    | 0    | 0    | 0    | 0    | 0          | 1           | 0           | 1          | 1          | 1              | 0          | 0          | 0          | 1           | 0                    | 0                      | O164:H10                                     | 0.84        |
| K5200                                                  | ST540 clx     | 1              | 1  |    | 1              | 0           | 0          | 0    | 0    | 0    | 0    | 0    | 0          | 0           | 0           | 1          | 0          | 0              | 0          | 0          | 0          | 0           | 0                    | 0                      | OUT:H30                                      | 0           |
| <b>C8</b>                                              | <b>ST10</b>   | 3              |    | 3  | 3              | 3           | 3          | 0    | 0    | 0    | 0    | 2    | 0          | 0           | 0           | 0          | 2          | 2              | 0          | 0          | 0          | 3           | 0                    | 1(55)                  | O86a:H2                                      | 0.45 ± 0.26 |
| <b>C9</b><br>C10<br>K2361                              | <b>CG34</b>   | 2              | 2  |    | 2              | 1           | 2          | 0    | 0    | 0    | 0    | 0    | 0          | 1           | 1           | 2          | 2          | 0              | 0          | 0          | 0          | 0           | 0                    | OUT:H33 (90%, 9/10)    | 1.31 ± 0.52                                  |             |
|                                                        |               | 7              | 7  |    | 7              | 7           | 7          | 0    | 0    | 0    | 0    | 1    | 1          | 1           | 5           | 2          | 7          | 5              | 0          | 0          | 0          | 4           | 0                    |                        |                                              | 0           |
|                                                        |               | 1              | 1  |    | 1              | 1           | 1          | 0    | 0    | 0    | 0    | 1    | 0          | 0           | 1           | 0          | 1          | 1              | 0          | 0          | 0          | 0           | 0                    |                        |                                              | 0           |
| K7672                                                  | <b>CG131</b>  | 1              | 1  |    | 1              | 1           | 1          | 0    | 0    | 0    | 0    | 1    | 0          | 0           | 0           | 1          | 0          | 0              | 0          | 0          | 1          | 1           | 0                    | 1(14)                  | O25:H4 (83%, 29/35)<br>O25:H10 (6%, 2/35)    | 0.31 ± 0.22 |
| C11                                                    |               | 30             | 30 |    | 30             | 30          | 22         | 0    | 0    | 0    | 0    | 30   | 2          | 2           | 4           | 21         | 0          | 0              | 0          | 0          | 29         | 28          | 0                    | 23(14)                 |                                              |             |
| K7459                                                  |               | 1              | 1  |    | 1              | 1           | 1          | 0    | 0    | 0    | 0    | 1    | 0          | 0           | 0           | 1          | 0          | 0              | 0          | 0          | 1          | 1           | 0                    | 1(14)                  |                                              |             |
| C12                                                    |               | 2              | 2  |    | 2              | 1           | 1          | 0    | 0    | 0    | 0    | 2    | 0          | 0           | 1           | 0          | 0          | 0              | 0          | 0          | 0          | 0           | 0                    | 2(14)                  |                                              |             |
| K4966                                                  |               | 1              | 1  |    | 1              | 1           | 1          | 0    | 0    | 0    | 0    | 1    | 0          | 1           | 0           | 1          | 0          | 0              | 1          | 1          | 1          | 1           | 0                    | 0                      |                                              |             |
| K2605                                                  | ST538 clx     | 1              | 1  |    | 1              | 0           | 1          | 0    | 0    | 0    | 0    | 0    | 1          | 1           | 0           | 0          | 0          | 1              | 0          | 0          | 0          | 0           | 0                    | 0                      | OUT:H4                                       | 0.53        |
| K5922                                                  | ST1873        | 1              | 1  |    | 1              | 1           | 0          | 0    | 0    | 0    | 0    | 0    | 0          | 0           | 0           | 0          | 0          | 0              | 1          | 1          | 0          | 0           | 0                    | 0                      | OUT:H4                                       | 0           |
| K3606                                                  | ST127         | 1              | 1  |    | 1              | 0           | 0          | 0    | 0    | 0    | 0    | 0    | 0          | 1           | 0           | 0          | 0          | 0              | 1          | 1          | 0          | 0           | 0                    | 1(14)                  | O6:H31                                       | NT          |
| K7495                                                  | ST643 clx     | 1              | 1  |    | 1              | 1           | 1          | 0    | 1    | 0    | 0    | 0    | 1          | 1           | 0           | 0          | 0          | 1              | 0          | 0          | 0          | 0           | 0                    | 0                      | O114:H7                                      | 0           |
| K7691                                                  | <b>CG95</b>   | 1              | 1  |    | 1              | 0           | 0          | 0    | 0    | 0    | 0    | 0    | 0          | 0           | 0           | 0          | 0          | 0              | 0          | 1          | 0          | 1           | 0                    | 0                      | O91:HND                                      | 0.22        |
| K4840                                                  |               | 1              | 1  |    | 1              | 1           | 1          | 0    | 1    | 0    | 0    | 0    | 1          | 0           | 0           | 0          | 0          | 0              | 0          | 1          | 0          | 0           | 0                    | 0                      | O111:H7                                      | 0.18        |
| K5185                                                  |               | 1              | 1  |    | 1              | 1           | 1          | 0    | 0    | 0    | 0    | 0    | 1          | 0           | 0           | 0          | 0          | 1              | 0          | 1          | 0          | 0           | 0                    | 0                      | O111:H7                                      | 0.02        |
| C13                                                    | ST501         | 2              | 1  | 1  | 2              | 2           | 2          | 0    | 0    | 0    | 0    | 0    | 1          | 0           | 0           | 1          | 2          | 0              | 2          | 0          | 2          | 0           | 1(14)                | O86a:H4, O86a:H1       | 0.23 ± 0.03                                  |             |
| K6863                                                  | ST714         | 1              | 1  |    | 1              | 0           | 1          | 0    | 0    | 0    | 0    | 1    | 0          | 0           | 0           | 0          | 0          | 0              | 0          | 0          | 1          | 1           | 0                    | 1(14)                  | O20:H11                                      | 0.21        |
| K9542                                                  | ST3032        | 1              |    | 1  | 1              | 1           | 1          | 1    | 0    | 0    | 0    | 0    | 0          | 0           | 0           | 0          | 1          | 1              | 0          | 1          | 1          | 1           | 0                    | 0                      | O126:H31                                     | 1.23        |
| C14                                                    | <b>CG38</b>   | 2              | 1  | 1  | 2              | 1           | 2          | 1    | 0    | 0    | 0    | 0    | 0          | 1           | 0           | 0          | 0          | 0              | 0          | 0          | 0          | 0           | 0                    | 1(15)                  | O86a:H30, OUT:HND                            | 0.19 ± 0.03 |
| K6756                                                  |               | 1              | 1  |    | 1              | 0           | 0          | 0    | 0    | 0    | 0    | 0    | 0          | 1           | 0           | 0          | 0          | 0              | 0          | 0          | 0          | 1           | 0                    | 0                      | O86a:H18                                     | 0           |
| K4619                                                  | ST31 clx      | 1              | 1  |    | 1              | 1           | 1          | 1    | 0    | 0    | 0    | 0    | 0          | 1           | 1           | 0          | 1          | 1              | 0          | 0          | 1          | 0           | 0                    | 0                      | OUT:H18                                      | 0.04        |
| K5105                                                  | ST69 clx      | 1              | 1  |    | 1              | 0           | 0          | 0    | 0    | 0    | 0    | 0    | 0          | 1           | 1           | 0          | 0          | 0              | 0          | 0          | 0          | 0           | 0                    | 0                      | OUT:H18                                      | 0           |

A clonal group (CG) was defined as a group of closely related sequence type and named in accordance with the dominant ST. A cluster was defined as a group of strains showing the same MLS. Major clonal groups are in bold black column. Dark gray and light gray boxes represent ≥50% and <50% positivity, respectively. The CTX-M subtype is shown in parenthesis in the ESBL column. Incidences of serotype in each group are shown in parentheses in the serotype column. The biofilm index of each group is shown as the average ± standard deviation. Abbreviations: T, total; K, Kagoshima; O, Osaka; EAEC, enteroaggregative *Escherichia coli*; UPEC, uropathogenic *E. coli*; ESBL, extended-spectrum β-lactamase: clx, complex.
