# Supplementary material
Source: PubMed Central journal article supplement (PMC4963495)

Figure S1

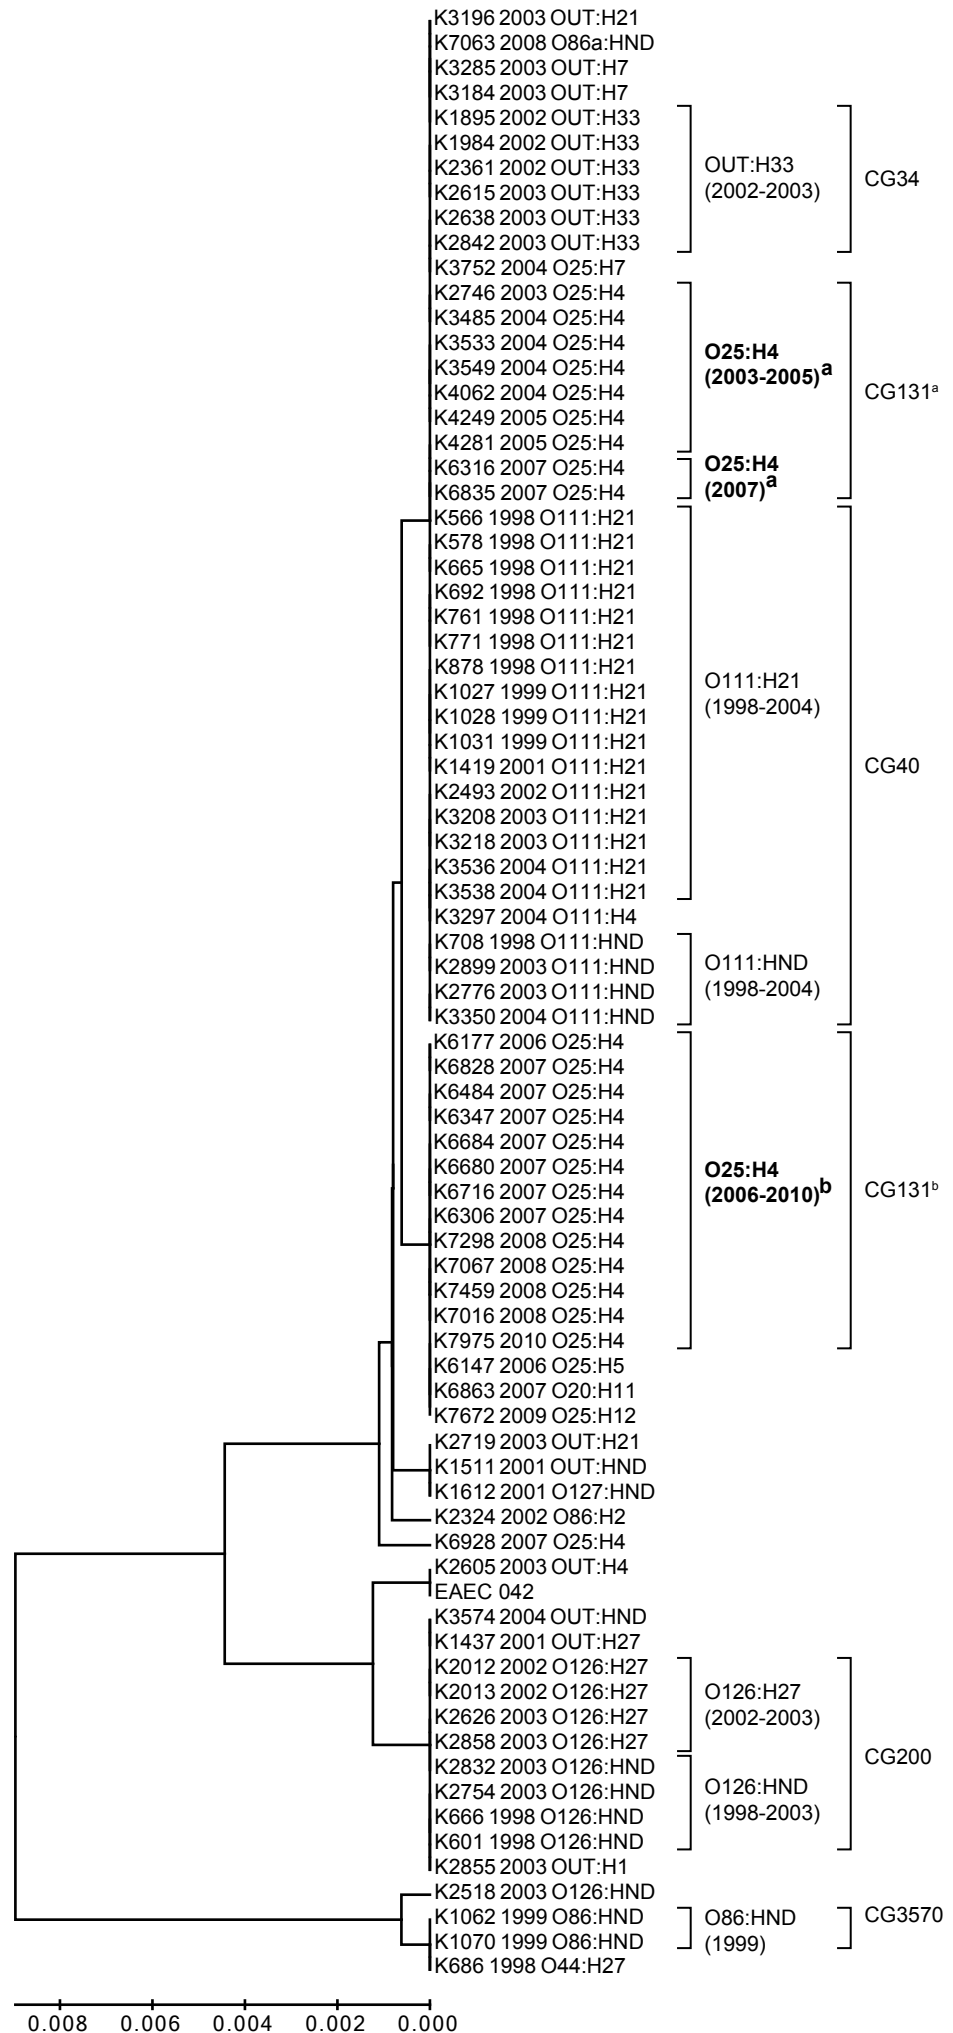

Supplement: JCM.00711-16_zjm999095095so1.pdf [file JCM.00711-16_zjm999095095so1.pdf]
